# Supplementary material
Source: publisher site journal article supplement (https://www.dovepress.com/article/450236)
Supplement: Supplementary file 1 [file get_supplementary_file.php]

**SUPPLEMENTARY INFORMATION**

**Table S1.** E-value for the interaction effects

| **Interaction terms** | **Adjusted model** | |
| --- | --- | --- |
|  | **aRRa** | **Upper/lower CIb** |
| Nonsmokers*with antenatal depression | 5.95 | Lower 5.61 |
| Quitters-Low *without antenatal depression | 1.39 | Upper 1.00 |
| Quitters-Low*with antenatal depression | 6.73 | Lower 5.12 |
| Quitters-High*without antenatal depression | 2.17 | Upper 1.11 |
| Quitters-High*with antenatal depression | 5.57 | Lower 3.58 |
| Maintainers-Low*without antenatal depression | 2.04 | Upper 1.60 |
| Maintainers-Low*with antenatal depression | 5.75 | Lower 4.74 |
| Maintainers-High*without antenatal depression | 1.40 | Lower 1.00 |
| Maintainers-High*with antenatal depression | 6.68 | Lower 5.69 |
| Reducers*without antenatal depression | 1.63 | Upper 1.00 |
| Reducers*with antenatal depression | 6.84 | Lower 5.31 |
| Increasers*without antenatal depression | 19.49 | Upper 10.59 |
| Increasers*with antenatal depression | 9.85 | Lower 2.73 |

aRR: adjusted risk ratio; CI: confidence interval; a Indicates the minimum association that confounders would have to have with both exposure and outcome to explain away the observed adjusted RRs; b Indicates the minimum association that confounders would have to have with both exposure and outcome to move the upper or lower confidence limit to include the null.
